# Supplementary material for: Operando observation of the dynamic SEI formation on a carbonaceous electrode by near-ambient pressure XPS
Source: Royal Society of Chemistry journal article supplement (doi:10.1039/d3ee03228k), 2024-01-01
Supplement: d3ee03228k1.pdf [file d3ee03228k1.pdf]

## ***Operando* observation of the dynamical SEI formation on a carbonaceous electrode by Near-Ambient Pressure XPS**

F. Capone<sup>1,2,3</sup>, J. Sottmann<sup>1,2,3,§</sup>, V. Meunier<sup>1,4</sup>, Lucia Pérez Ramírez<sup>1,2,3</sup>, A. Grimaud<sup>1,4</sup>, A. Iadecola<sup>1,3</sup>, M. Scardamaglia<sup>5</sup>, J.-P. Rueff<sup>2,6</sup>, R. Dedryvère<sup>1,7,\*</sup>

<sup>1</sup> RS2E, Réseau sur le Stockage Electrochimique de l'Energie, FR CNRS 3459, France

<sup>2</sup> Synchrotron SOLEIL, L'Orme des Merisiers, 91190 Saint-Aubin, France

<sup>3</sup> PHENIX, Sorbonne Université, CNRS, 75005 Paris, France

<sup>4</sup> Chimie du Solide-Energie, UMR 8260, Collège de France, 75231 Paris cedex 05, France

<sup>5</sup> MAX IV Laboratory, Lund University, 225 94 Lund, Sweden

<sup>6</sup> Laboratoire de Chimie Physique-Matière et Rayonnement, Sorbonne Université, CNRS, 75005 Paris, France

<sup>7</sup> IPREM, CNRS, Université de Pau & Pays Adour, E2S-UPPA, 64000 Pau, France

<sup>§</sup> Current address: Hydro Batteries, Hydro Energi AS, Drammensveien 264, NO-0283 Oslo, Norway

## **Supplementary information**

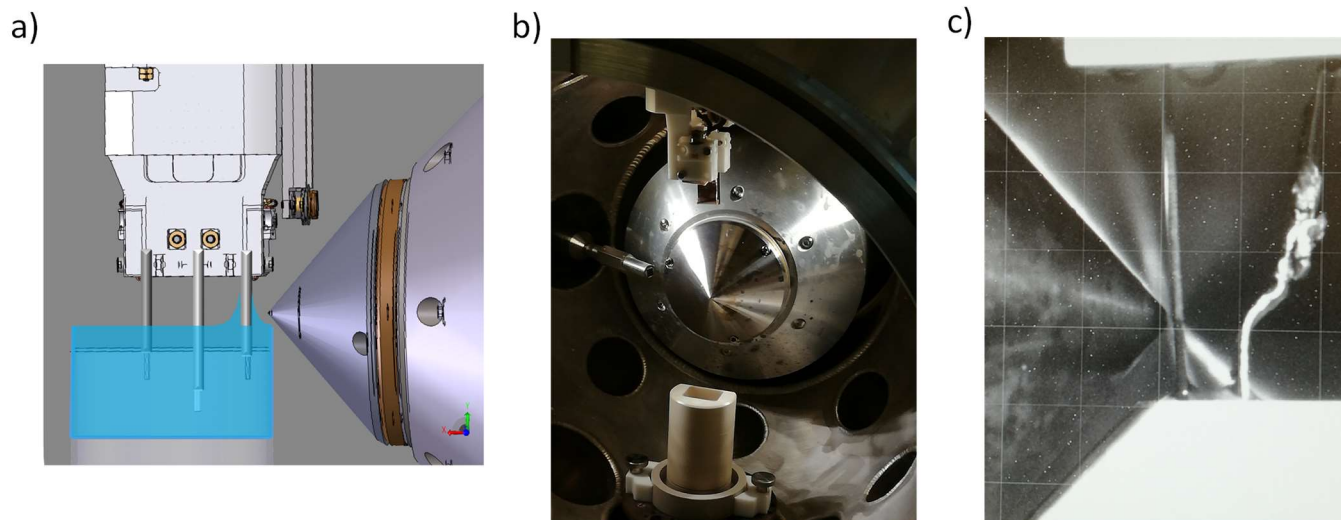

**Figure S1** : Experimental dip and pull setup: (a) and (b) Schematic view and photo of the electrochemical cell and photoelectron analyzer; (c) Photo taken during the experiment.

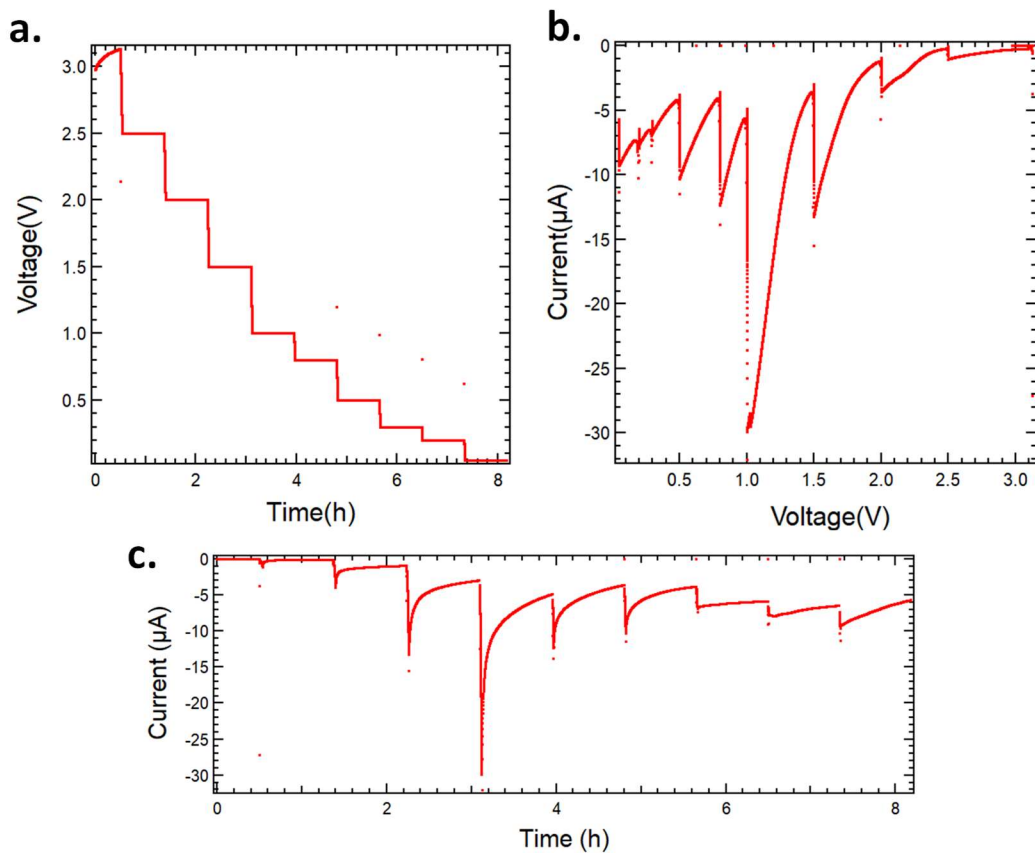

**Figure S2** : Electrochemical behaviour of the cell in the in-house argon glovebox: **(a)** Voltage vs. time profile applied from OCV (Open Circuit Voltage) to 0.05 vs.  $\text{Li}^+/\text{Li}$ ; **(b)** Resulting current intensity vs. voltage curve; **(d)** Variation of the current intensity vs. time.

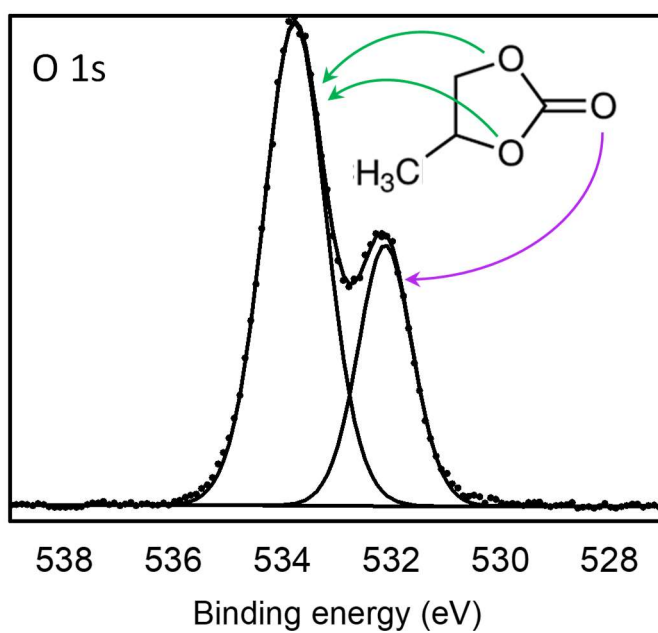

**Figure S3** : O 1s spectrum of pure PC solvent, as a frozen liquid drop at  $T = -140^{\circ}\text{C}$  under ultra-high vacuum (in-house XPS spectrometer at  $h\nu = 1486.7$  eV).

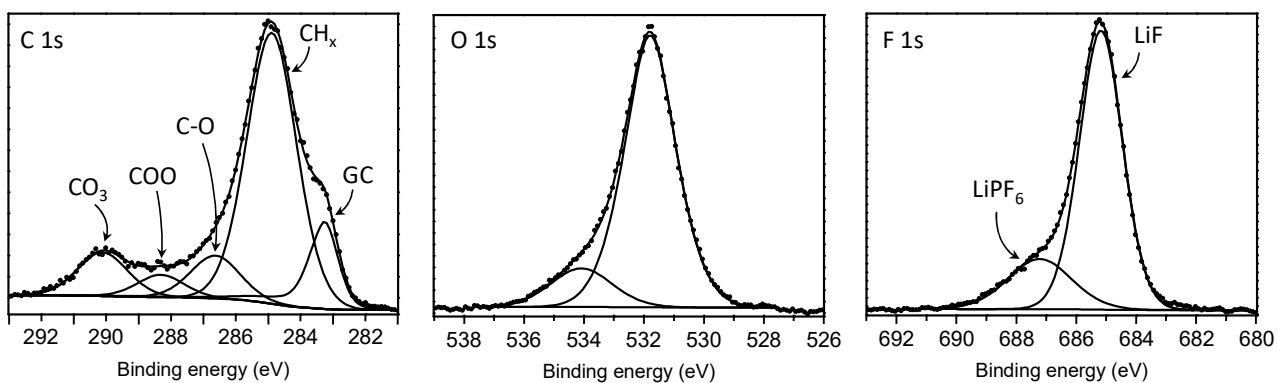

**Figure S4** : *Ex situ* XPS C 1s, O 1s and F 1s spectra of the GC electrode's surface, recorded in vacuum after the end of the *operando* dip & pull experiment (which was stopped at 0.05 V applied potential).
